# Supplementary material
Source: PubMed Central journal article supplement (PMC5014209)
Supplement: JPE-52-1558-s001.pdf [file JPE-52-1558-s001.pdf]

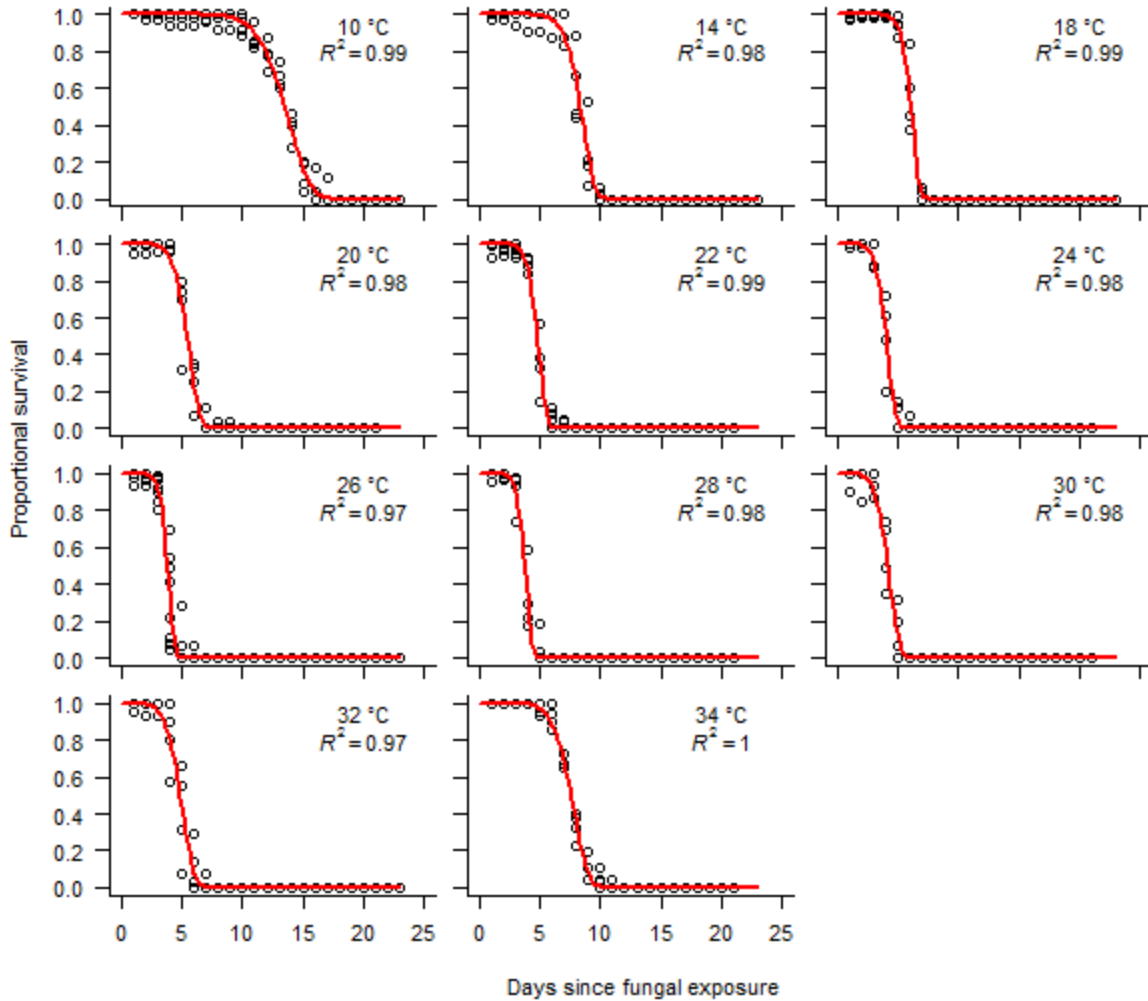

Fig. S1. Graphical evaluation of Weibull parameter fits of corrected mosquito survival at the high fungal application rate. Points represent corrected daily proportional survival from treatment replicates, and lines represent best fit curves for each temperature treatment with the associated  $R^2$  noted in the legend. Similarly high  $R^2$  values were obtained for the fits of the low application rate survival data ( $R^2=0.95-0.99$ , curves not shown).
