# Supplementary material
Source: PubMed Central journal article supplement (PMC5014209)
Supplement: JPE-52-1558-s002.pdf [file JPE-52-1558-s002.pdf]

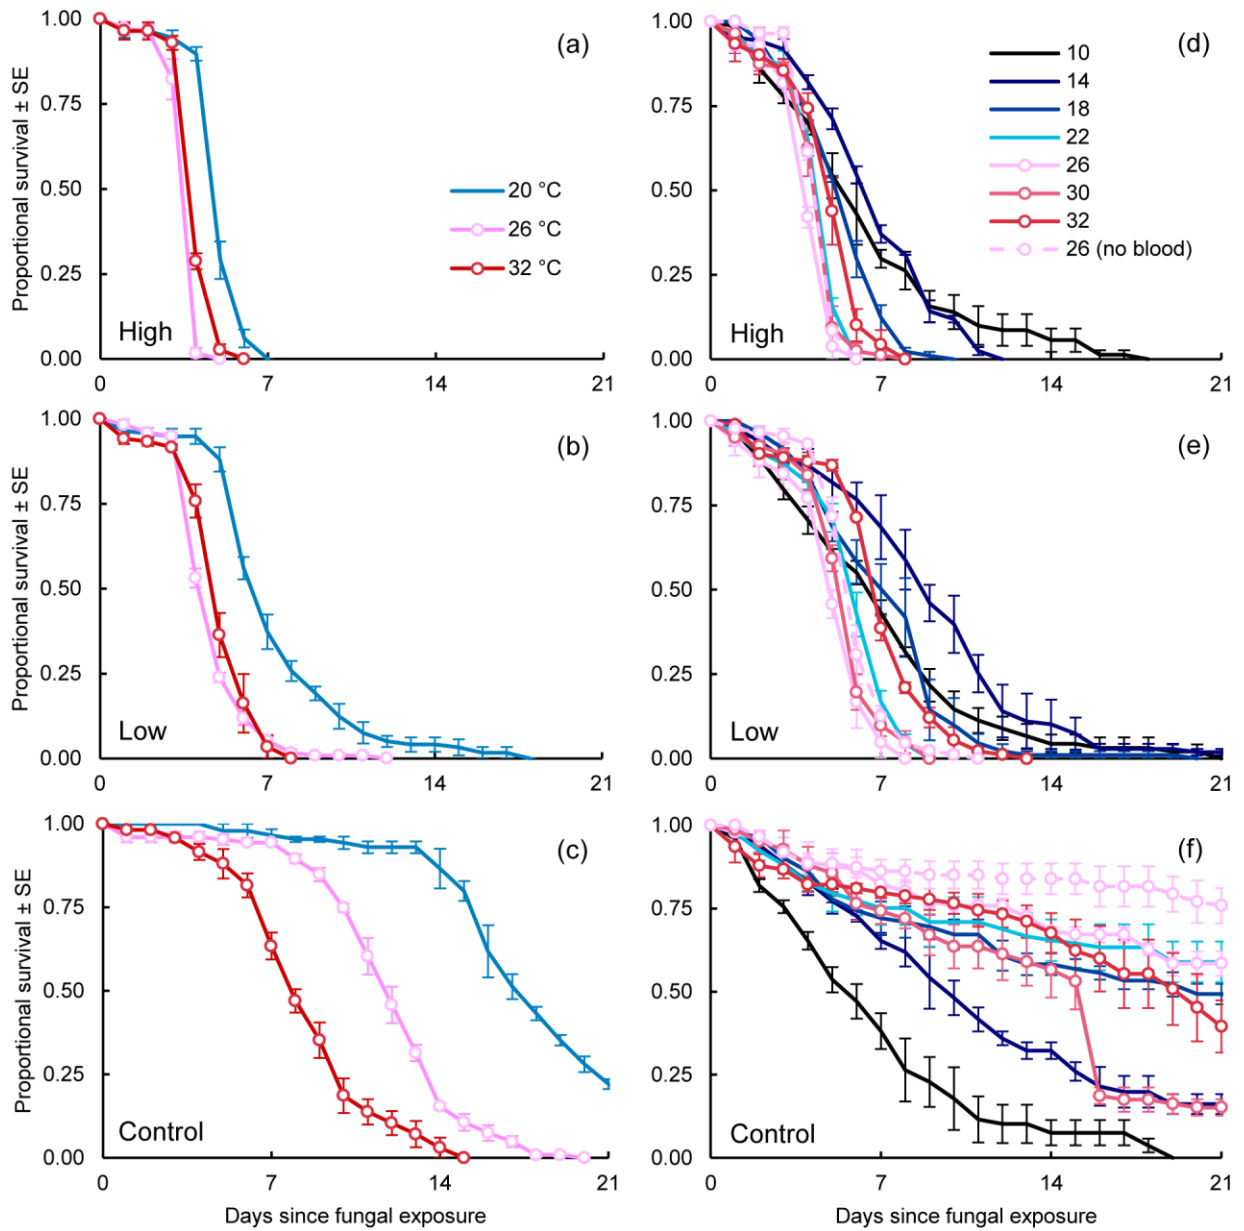

Fig. S2. Cumulative proportional survival in *An. gambiae* and blood-fed experiments. Lines represent mean daily survival ( $\pm$  one standard error) from N=3 replicates of approximately 30 mosquitoes. Temperature is indicated by line colour, and fungal application rate (high, low, control) is noted on each graph. (a–c) Survival of *An. gambiae* following fungal exposure. Mortality in this experiment was monitored for 35 days; curves are truncated for consistency. (d–f) Survival of blood-fed *An. stephensi* following fungal exposure. The non-blood-fed 26 °C treatment ('no blood') from this experiment is included for reference.
