# Supplementary material
Source: PubMed Central journal article supplement (PMC5014209)
Supplement: JPE-52-1558-s003.pdf [file JPE-52-1558-s003.pdf]

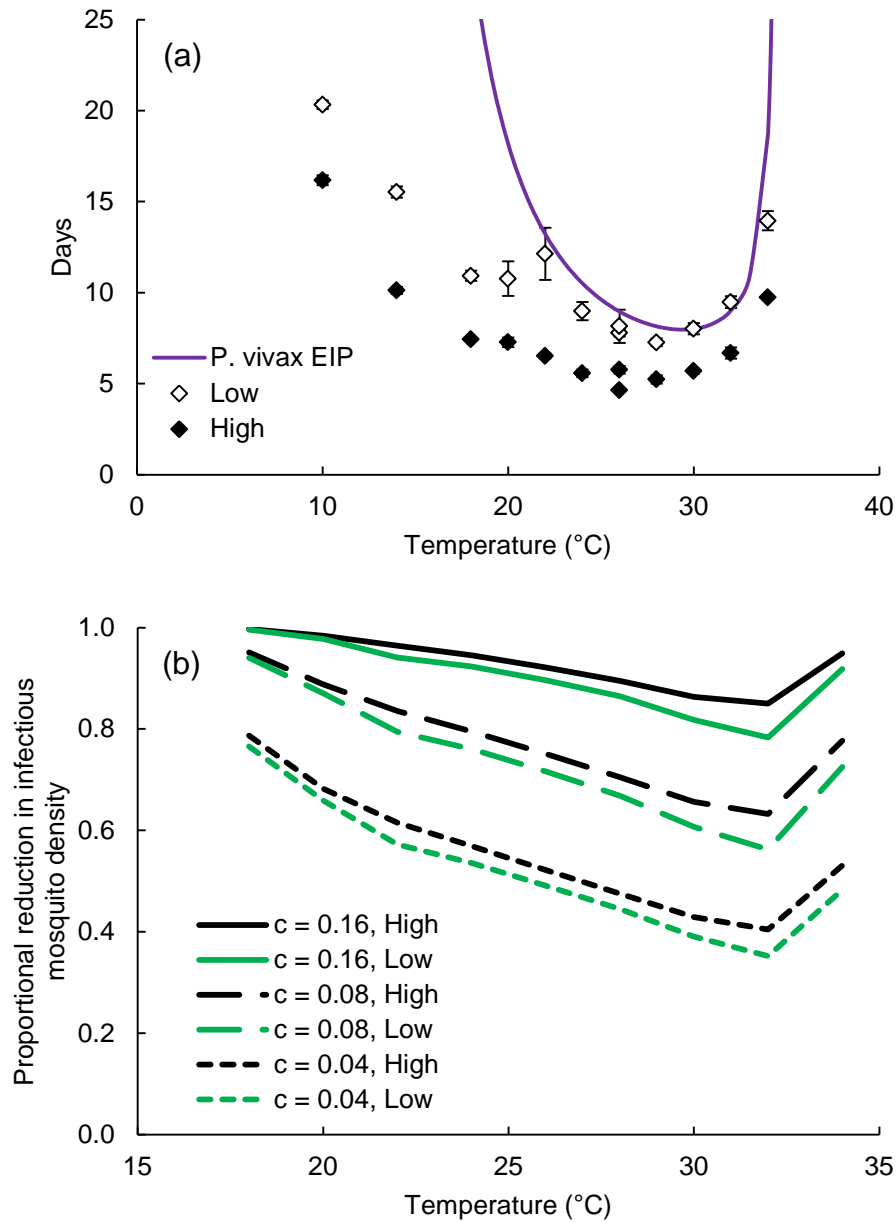

Fig. S3. Predicted fungal efficacy against *P. vivax* malaria. (a) Points represent the predicted time to 90% mortality in non-blood-fed *An. stephensi* mosquitoes ( $\pm$  standard error) following exposure to fungus at the high and low application rates. The *P. vivax* extrinsic incubation period (EIP) is based on the curve described by Cator *et al.* (2013). (b) Lines represent predicted proportional reduction in the density of *P. vivax* malaria-infectious mosquitoes relative to no intervention for various daily probabilities of fungal infection ( $c$ ) at the high and low fungal application rates.
