# Supplementary material
Source: PubMed Central journal article supplement (PMC5014209)
Supplement: JPE-52-1558-s005.pdf [file JPE-52-1558-s005.pdf]

Table S1. Model parameters and values.  $T$  represents temperature in temperature-dependent parameters. Table adapted from Hancock *et al.* (2009) and Mordecai *et al.* (2013).

| Parameter      | Description                                                                                                          | Value                                                              | Species                                                                                                                                                      | Source                        |
|----------------|----------------------------------------------------------------------------------------------------------------------|--------------------------------------------------------------------|--------------------------------------------------------------------------------------------------------------------------------------------------------------|-------------------------------|
| $\varepsilon$  | adult recruitment rate to $S_1$ class                                                                                | $0.2 \text{ day}^{-1}$                                             |                                                                                                                                                              | Hancock <i>et al.</i> (2009)  |
| $c$            | daily probability of fungal infection                                                                                | $1 - e^{-F}$                                                       |                                                                                                                                                              |                               |
| $F$            | rate of fungal infection                                                                                             | varies ( $\text{day}^{-1}$ )                                       |                                                                                                                                                              |                               |
| $\beta, \mu_F$ | shape and rate parameters describing relationship between time since fungal infection and risk of mosquito mortality | see Table S2                                                       | <i>An. stephensi</i>                                                                                                                                         |                               |
| $x$            | proportion of humans with transmissible malaria                                                                      | 0.5                                                                |                                                                                                                                                              | Hancock <i>et al.</i> (2009)  |
| $b^2$          | vector competence                                                                                                    | $-0.54T^2 + 25.2T - 206$                                           | <i>An. quadrimaculatus</i> and <i>P. vivax</i>                                                                                                               | Mordecai <i>et al.</i> (2013) |
| $\mu$          | background mosquito mortality rate                                                                                   | $-\ln(-0.000828T^2 + 0.0367T + 0.522)$                             | <i>An. gambiae</i>                                                                                                                                           | Mordecai <i>et al.</i> (2013) |
| $a$            | mosquito biting rate                                                                                                 | $0.000203T(T - 11.7)(42.3 - T)^{0.5}$                              | <i>An. pseudopunctipennis</i>                                                                                                                                | Mordecai <i>et al.</i> (2013) |
| $t_E$          | malarial extrinsic incubation period (EIP)                                                                           | <i>P. falciparum:</i><br>$1/[0.000111T(T - 14.7)(34.4 - T)^{0.5}]$ | <i>An. gambiae,</i><br><i>An. culicifacies,</i><br><i>An. stephensi,</i><br><i>An. quadrimaculatus,</i><br><i>An. atroparvus</i>                             | Mordecai <i>et al.</i> (2013) |
|                |                                                                                                                      | <i>P. vivax:</i><br>$1/[0.000126T(T - 14.244)(34.4 - T)^{0.5}]$    | <i>An. culicifacies,</i><br><i>An. atabacensis,</i><br><i>An. freeborni,</i><br><i>An. quadrimaculatus,</i><br><i>An. stephensi,</i><br><i>An. maculatus</i> | Cator <i>et al.</i> (2013)    |
