# Supplementary material
Source: PubMed Central journal article supplement (PMC5014209)
Supplement: JPE-52-1558-s007.pdf [file JPE-52-1558-s007.pdf]

Table S3. Parametric model summaries. Parameter estimates ( $\pm$  standard error, SE) and associated  $z$  statistics are reported for Weibull analyses of each experiment by temperature ('Temp. ') and application rate (AR), with significance ('Sig. ') indicated by asterisks (\* indicates  $P < 0.05$ , \*\* indicates  $P < 0.001$ ). In the first (non-blood-fed) *An. stephensi* experiments, the two experimental dates were analysed separately (indicated by 1 and 2). In the blood feeding experiment, separate models were fit for the blood-fed groups (10–32 °C) and for the blood-fed vs. non-blood-fed treatments (26 °C only). In the diurnal temperature variation experiment, diurnal temperature range (DTR) was included as a separate parameter.

| Experiment               | Parameter          | Estimate $\pm$ SE | $z$                | Sig.               |         |    |
|--------------------------|--------------------|-------------------|--------------------|--------------------|---------|----|
| <i>An. stephensi</i> (1) | Intercept          | 3.680 $\pm$ 0.161 | 22.894             | **                 |         |    |
|                          | Temp.              | 20                | 3.409 $\pm$ 1.537  | 2.218              | *       |    |
|                          |                    | 22                | 2.209 $\pm$ 0.834  | 2.648              | *       |    |
|                          |                    | 24                | -0.196 $\pm$ 0.195 | -1.007             |         |    |
|                          |                    | 28                | -0.184 $\pm$ 0.204 | -0.902             |         |    |
|                          |                    | 30                | -0.668 $\pm$ 0.168 | -3.981             | **      |    |
|                          |                    | 34                | -0.767 $\pm$ 0.164 | -4.689             | **      |    |
|                          | AR                 | High              | -2.089 $\pm$ 0.162 | -12.910            | **      |    |
|                          |                    | Low               | -1.825 $\pm$ 0.163 | -11.234            | **      |    |
|                          | Temp. $\times$ AR  | 20, High          | -3.169 $\pm$ 1.537 | -2.062             | *       |    |
|                          |                    | 22, High          | -2.098 $\pm$ 0.835 | -2.514             | *       |    |
|                          |                    | 24, High          | 0.177 $\pm$ 0.197  | 0.900              |         |    |
|                          |                    | 28, High          | 0.107 $\pm$ 0.206  | 0.519              |         |    |
|                          |                    | 30, High          | 0.658 $\pm$ 0.170  | 3.873              | **      |    |
|                          |                    | 34, High          | 1.309 $\pm$ 0.165  | 7.912              | **      |    |
|                          |                    | 20, Low           | -3.141 $\pm$ 1.537 | -2.043             | *       |    |
|                          |                    | 22, Low           | -1.885 $\pm$ 0.835 | -2.257             | *       |    |
|                          |                    | 24, Low           | 0.297 $\pm$ 0.198  | 1.496              |         |    |
|                          |                    | 28, Low           | 0.128 $\pm$ 0.207  | 0.618              |         |    |
|                          |                    | 30, Low           | 0.708 $\pm$ 0.171  | 4.146              | **      |    |
|                          |                    | 34, Low           | 1.286 $\pm$ 0.168  | 7.657              | **      |    |
|                          |                    | Log(shape)        | 26, Control        | -0.854 $\pm$ 0.205 | -4.174  | ** |
|                          |                    |                   | 26, High           | -1.647 $\pm$ 0.072 | -22.985 | ** |
|                          | 26, Low            |                   | -1.437 $\pm$ 0.069 | -20.827            | **      |    |
|                          | 20, Control        |                   | 0.443 $\pm$ 0.350  | 1.267              |         |    |
|                          | 20, High           |                   | -1.687 $\pm$ 0.065 | -26.170            | **      |    |
|                          | 20, Low            |                   | -1.186 $\pm$ 0.061 | -19.372            | **      |    |
|                          | 22, Control        |                   | 0.347 $\pm$ 0.253  | 1.370              |         |    |
|                          | 22, High           |                   | -1.563 $\pm$ 0.074 | -21.056            | **      |    |
|                          | 22, Low            |                   | -0.966 $\pm$ 0.061 | -15.854            | **      |    |
|                          | 24, Control        |                   | -0.969 $\pm$ 0.180 | -5.396             | **      |    |
|                          | 24, High           |                   | -1.745 $\pm$ 0.067 | -26.073            | **      |    |
|                          | 24, Low            |                   | -1.242 $\pm$ 0.062 | -19.998            | **      |    |
|                          | 28, Control        |                   | -0.947 $\pm$ 0.205 | -4.626             | **      |    |
| 28, High                 | -1.768 $\pm$ 0.069 |                   | -25.752            | **                 |         |    |
| 28, Low                  | -1.503 $\pm$ 0.068 |                   | -22.125            | **                 |         |    |
| 30, Control              | -0.783 $\pm$ 0.096 |                   | -8.135             | **                 |         |    |
| 30, High                 | -1.658 $\pm$ 0.076 |                   | -21.811            | **                 |         |    |
| 30, Low                  | -1.499 $\pm$ 0.063 |                   | -23.751            | **                 |         |    |
| 34, Control              | -1.200 $\pm$ 0.090 | -13.329           | **                 |                    |         |    |
| 34, High                 | -1.760 $\pm$ 0.068 | -25.732           | **                 |                    |         |    |
| 34, Low                  | -1.159 $\pm$ 0.074 | -15.716           | **                 |                    |         |    |
| <i>An. stephensi</i> (2) | Intercept          | 3.666 $\pm$ 0.510 | 7.185              | **                 |         |    |
|                          | Temp.              | 10                | 0.155 $\pm$ 0.558  | 0.278              |         |    |

| Experiment         | Parameter   | Estimate ± SE  | z       | Sig. |
|--------------------|-------------|----------------|---------|------|
|                    | 14          | 3.866 ± 3.219  | 1.201   |      |
|                    | 18          | 2.416 ± 0.550  | 4.393   | **   |
|                    | 32          | -0.671 ± 0.511 | -1.314  |      |
|                    | AR          |                |         |      |
|                    | High        | -2.238 ± 0.511 | -4.384  | **   |
|                    | Low         | -1.805 ± 0.518 | -3.486  | **   |
|                    | Temp. × AR  |                |         |      |
|                    | 10, High    | 1.070 ± 0.558  | 1.918   |      |
|                    | 14, High    | -3.078 ± 3.219 | -0.956  |      |
|                    | 18, High    | -1.936 ± 0.550 | -3.518  | **   |
|                    | 32, High    | 0.970 ± 0.513  | 1.893   |      |
|                    | 10, Low     | 0.855 ± 0.565  | 1.513   |      |
|                    | 14, Low     | -3.173 ± 3.220 | -0.985  |      |
|                    | 18, Low     | -2.038 ± 0.557 | -3.657  | **   |
|                    | 32, Low     | 0.883 ± 0.519  | 1.700   |      |
|                    | Log(shape)  |                |         |      |
|                    | 26, Control | -0.646 ± 0.495 | -1.305  |      |
|                    | 26, High    | -2.045 ± 0.103 | -19.846 | **   |
|                    | 26, Low     | -1.256 ± 0.098 | -12.861 | **   |
|                    | 10, Control | -0.644 ± 0.142 | -4.527  | **   |
|                    | 10, High    | -1.855 ± 0.076 | -24.399 | **   |
|                    | 10, Low     | -1.777 ± 0.122 | -14.586 | **   |
|                    | 14, Control | 0.272 ± 0.648  | 0.419   |      |
|                    | 14, High    | -2.135 ± 0.182 | -11.763 | **   |
|                    | 14, Low     | -1.488 ± 0.107 | -13.892 | **   |
|                    | 18, Control | 0.227 ± 0.075  | 3.018   | *    |
|                    | 18, High    | -2.147 ± 0.077 | -28.056 | **   |
|                    | 18, Low     | -1.700 ± 0.088 | -19.392 | **   |
|                    | 32, Control | -1.253 ± 0.177 | -7.079  | **   |
|                    | 32, High    | -1.583 ± 0.151 | -10.469 | **   |
|                    | 32, Low     | -1.551 ± 0.049 | -31.485 | **   |
| <i>An. gambiae</i> | Intercept   | 2.567 ± 0.024  | 107.065 | **   |
|                    | Temp.       |                |         |      |
|                    | 20          | 0.298 ± 0.046  | 6.497   | **   |
|                    | 32          | -0.314 ± 0.038 | -8.221  | **   |
|                    | AR          |                |         |      |
|                    | High        | -1.186 ± 0.026 | -45.520 | **   |
|                    | Low         | -0.882 ± 0.039 | -22.904 | **   |
|                    | Temp. × AR  |                |         |      |
|                    | 20, High    | 0.027 ± 0.050  | 0.536   |      |
|                    | 32, High    | 0.430 ± 0.043  | 10.084  | **   |
|                    | 20, Low     | 0.145 ± 0.066  | 2.189   | *    |
|                    | 32, Low     | 0.352 ± 0.054  | 6.467   | **   |
|                    | Log(shape)  |                |         |      |
|                    | 26, Control | -1.355 ± 0.073 | -18.646 | **   |
|                    | 26, High    | -2.230 ± 0.072 | -30.804 | **   |
|                    | 26, Low     | -1.178 ± 0.063 | -18.727 | **   |
|                    | 20, Control | -0.915 ± 0.074 | -12.430 | **   |
|                    | 20, High    | -1.769 ± 0.075 | -23.677 | **   |
|                    | 20, Low     | -0.961 ± 0.066 | -14.644 | **   |
|                    | 32, Control | -1.169 ± 0.070 | -16.673 | **   |
|                    | 32, High    | -1.798 ± 0.071 | -25.391 | **   |
|                    | 32, Low     | -1.367 ± 0.074 | -18.448 | **   |
| Blood-fed          | Intercept   | 3.478 ± 0.108  | 32.110  | **   |
|                    | Temp.       |                |         |      |
|                    | 10          | -1.428 ± 0.134 | -10.656 | **   |
|                    | 14          | -0.781 ± 0.130 | -6.008  | **   |
|                    | 18          | 0.058 ± 0.196  | 0.295   |      |
|                    | 22          | 0.322 ± 0.225  | 1.434   |      |
|                    | 30          | -0.698 ± 0.129 | -5.418  | **   |
|                    | 32          | -0.534 ± 0.133 | -4.029  | **   |
|                    | AR          |                |         |      |
|                    | High        | -1.973 ± 0.111 | -17.787 | **   |
|                    | Low         | -1.745 ± 0.117 | -14.884 | **   |

| Experiment                    | Parameter      | Estimate ± SE         | z              | Sig.           |         |    |
|-------------------------------|----------------|-----------------------|----------------|----------------|---------|----|
|                               | Temp. × AR     | 10, High              | 1.903 ± 0.152  | 12.520         | **      |    |
|                               |                | 14, High              | 1.313 ± 0.133  | 9.894          | **      |    |
|                               |                | 18, High              | 0.247 ± 0.198  | 1.246          |         |    |
|                               |                | 22, High              | -0.227 ± 0.226 | -1.004         |         |    |
|                               |                | 30, High              | 0.778 ± 0.137  | 5.697          | **      |    |
|                               |                | 32, High              | 0.743 ± 0.141  | 5.290          | **      |    |
|                               |                | 10, Low               | 1.787 ± 0.153  | 11.698         | **      |    |
|                               |                | 14, Low               | 1.408 ± 0.157  | 8.949          | **      |    |
|                               |                | 18, Low               | 0.318 ± 0.218  | 1.462          |         |    |
|                               |                | 22, Low               | -0.175 ± 0.230 | -0.761         |         |    |
|                               |                | 30, Low               | 0.776 ± 0.142  | 5.477          | **      |    |
|                               |                | 32, Low               | 0.856 ± 0.141  | 6.054          | **      |    |
|                               |                | Log(shape)            | 26, Control    | -0.209 ± 0.164 | -1.275  |    |
|                               |                |                       | 26, High       | -1.528 ± 0.033 | -46.552 | ** |
|                               | 26, Low        |                       | -1.246 ± 0.141 | -8.844         | **      |    |
|                               | 10, Control    |                       | -0.470 ± 0.051 | -9.135         | **      |    |
|                               | 10, High       |                       | -0.628 ± 0.086 | -7.287         | **      |    |
|                               | 10, Low        |                       | -0.596 ± 0.070 | -8.479         | **      |    |
|                               | 14, Control    |                       | -0.230 ± 0.062 | -3.741         | **      |    |
|                               | 14, High       |                       | -1.042 ± 0.102 | -10.191        | **      |    |
|                               | 14, Low        |                       | -0.762 ± 0.026 | -29.175        | **      |    |
|                               | 18, Control    |                       | 0.085 ± 0.034  | 2.513          | *       |    |
|                               | 18, High       |                       | -1.253 ± 0.058 | -21.467        | **      |    |
|                               | 18, Low        |                       | -0.979 ± 0.034 | -29.108        | **      |    |
|                               | 22, Control    |                       | 0.166 ± 0.046  | 3.626          | **      |    |
|                               | 22, High       |                       | -1.584 ± 0.137 | -11.600        | **      |    |
|                               | 22, Low        |                       | -1.314 ± 0.058 | -22.782        | **      |    |
|                               | 30, Control    |                       | -0.541 ± 0.047 | -11.630        | **      |    |
|                               | 30, High       |                       | -1.425 ± 0.059 | -24.299        | **      |    |
|                               | 30, Low        |                       | -1.305 ± 0.070 | -18.733        | **      |    |
|                               | 32, Control    | -0.561 ± 0.106        | -5.275         | **             |         |    |
|                               | 32, High       | -1.269 ± 0.118        | -10.723        | **             |         |    |
| 32, Low                       | -1.225 ± 0.025 | -48.346               | **             |                |         |    |
| Blood vs. no blood            | Intercept      | 3.660 ± 0.084         | 43.540         | **             |         |    |
|                               | Diet           | Blood                 | -0.115 ± 0.024 | -4.800         | **      |    |
|                               | AR             | High                  | -2.057 ± 0.085 | -24.320        | **      |    |
|                               |                | Low                   | -1.788 ± 0.086 | -20.800        | **      |    |
|                               | Log(shape)     | 26, Control, No blood | -0.352 ± 0.136 | -2.600         | *       |    |
|                               |                | 26, High, No blood    | -1.975 ± 0.084 | -23.420        | **      |    |
|                               |                | 26, Low, No blood     | -1.424 ± 0.077 | -18.530        | **      |    |
|                               |                | 26, Control, Blood    | -0.186 ± 0.121 | -1.530         |         |    |
| 26, High, Blood               |                | -1.509 ± 0.091        | -16.640        | **             |         |    |
| 26, Low, Blood                |                | -1.260 ± 0.092        | -13.660        | **             |         |    |
| Diurnal temperature variation | Intercept      | 7.250 ± 1.055         | 6.872          | **             |         |    |
|                               | DTR            | DTR=12                | -2.013 ± 0.388 | -5.193         | **      |    |
|                               | AR             | High                  | -5.725 ± 1.055 | -5.426         | **      |    |
|                               |                | Low                   | -5.289 ± 1.055 | -5.013         | **      |    |
|                               | Temp.          | 20                    | -0.232 ± 1.008 | -0.230         |         |    |
|                               |                | 32                    | -2.495 ± 0.924 | -2.700         | *       |    |
|                               | DTR × AR       | DTR=12, High          | 2.190 ± 0.387  | 5.656          | **      |    |
|                               |                | DTR=12, Low           | 2.037 ± 0.387  | 5.263          | **      |    |
|                               | DTR × Temp.    | DTR=12, 20            | -0.086 ± 0.043 | -1.983         | *       |    |
|                               |                | DTR=12, 32            | -0.025 ± 0.043 | -0.571         |         |    |
|                               | AR × Temp.     | High, 20              | 0.527 ± 1.008  | 0.523          |         |    |
|                               |                | Low, 20               | 0.606 ± 1.008  | 0.601          |         |    |

| Experiment | Parameter           | Estimate $\pm$ SE  | $z$      | Sig. |
|------------|---------------------|--------------------|----------|------|
|            | High, 32            | 2.693 $\pm$ 0.924  | 2.915    | *    |
|            | Low, 32             | 2.647 $\pm$ 0.924  | 2.865    | *    |
| Log(shape) | 26, Control, DTR=0  | 0.348 $\pm$ 0.217  | 1.604    |      |
|            | 20, Control, DTR=0  | 0.260 $\pm$ 0.152  | 1.715    |      |
|            | 32, Control, DTR=0  | -0.143 $\pm$ 0.172 | -0.831   |      |
|            | 26, High, DTR=0     | -2.059 $\pm$ 0.011 | -180.892 | **   |
|            | 20, High, DTR=0     | -1.831 $\pm$ 0.158 | -11.618  | **   |
|            | 32, High, DTR=0     | -1.951 $\pm$ 0.042 | -46.188  | **   |
|            | 26, Low, DTR=0      | -1.544 $\pm$ 0.073 | -21.148  | **   |
|            | 20, Low, DTR=0      | -0.954 $\pm$ 0.046 | -20.756  | **   |
|            | 32, Low, DTR=0      | -1.439 $\pm$ 0.073 | -19.611  | **   |
|            | 26, Control, DTR=12 | -0.558 $\pm$ 0.448 | -1.246   |      |
|            | 20, Control, DTR=12 | -0.056 $\pm$ 0.100 | -0.557   |      |
|            | 32, Control, DTR=12 | -1.021 $\pm$ 0.117 | -8.702   | **   |
|            | 26, High, DTR=12    | -2.013 $\pm$ 0.058 | -34.533  | **   |
|            | 20, High, DTR=12    | -1.857 $\pm$ 0.025 | -73.292  | **   |
|            | 32, High, DTR=12    | -1.857 $\pm$ 0.068 | -27.453  | **   |
|            | 26, Low, DTR=12     | -1.669 $\pm$ 0.119 | -14.085  | **   |
|            | 20, Low, DTR=12     | -1.167 $\pm$ 0.110 | -10.642  | **   |
|            | 32, Low, DTR=12     | -1.303 $\pm$ 0.114 | -11.418  | **   |
