# Supplementary material
Source: PubMed Central journal article supplement (PMC5014209)
Supplement: JPE-52-1558-s008.pdf [file JPE-52-1558-s008.pdf]

Table S4. Mosquito median survival time (MST) following fungal exposure. For each experiment, we report the predicted MST in days ( $\pm$  95% confidence interval, CI) for each temperature ('Temp.') and application rate (AR) combination. We did not predict MST for treatments in which more than 50% of mosquitoes survived to the end of the experiment (indicated by 'na'). In the *An. stephensi* experiment, experimental group is indicated in parentheses. In the blood feeding experiment, the MSTs from two separate analyses are presented. In the first (a), only the blood-fed groups were evaluated ('Blood'). In the second (b), the 26 °C blood-fed treatment was evaluated relative to the 26 °C non-blood-fed treatment ('No blood'). In the fluctuating temperature experiment, DTR indicates diurnal temperature range.

| Experiment               | Treatment          | Temp.  | MST ( $\pm$ 95% CI) |                   |                  |
|--------------------------|--------------------|--------|---------------------|-------------------|------------------|
|                          |                    |        | Control             | High AR           | Low AR           |
| <i>An. stephensi</i>     |                    | 10 (2) | na*                 | 13.41 $\pm$ 0.35  | 16.59 $\pm$ 0.92 |
|                          |                    | 14 (2) | na*                 | 8.78 $\pm$ 0.58   | 11.84 $\pm$ 0.23 |
|                          |                    | 18 (2) | na*                 | 6.46 $\pm$ 0.15   | 8.77 $\pm$ 0.23  |
|                          |                    | 20 (1) | na                  | 5.82 $\pm$ 0.41   | 7.46 $\pm$ 0.68  |
|                          |                    | 22 (1) | na                  | 5.07 $\pm$ 0.18   | 7.68 $\pm$ 1.21  |
|                          |                    | 24 (1) | na                  | 4.51 $\pm$ 0.30   | 6.35 $\pm$ 0.26  |
|                          |                    | 26 (1) | na                  | 4.57 $\pm$ 0.23   | 5.86 $\pm$ 0.19  |
|                          |                    | 26 (2) | na*                 | 3.98 $\pm$ 0.15   | 5.79 $\pm$ 0.89  |
|                          |                    | 28 (1) | na*                 | 4.26 $\pm$ 0.26   | 5.56 $\pm$ 0.15  |
|                          |                    | 30 (1) | 17.20 $\pm$ 0.40    | 4.53 $\pm$ 0.40   | 6.13 $\pm$ 0.29  |
|                          |                    | 32 (2) | 18.01 $\pm$ 0.48    | 5.22 $\pm$ 0.48   | 7.35 $\pm$ 0.51  |
|                          |                    | 34 (1) | 16.49 $\pm$ 0.09    | 7.92 $\pm$ 0.09   | 9.57 $\pm$ 1.38  |
|                          | <i>An. gambiae</i> |        | 20                  | 15.15 $\pm$ 0.19  | 5.17 $\pm$ 0.19  |
|                          |                    | 26     | 11.85 $\pm$ 0.08    | 3.82 $\pm$ 0.08   | 4.82 $\pm$ 0.31  |
|                          |                    | 32     | 8.49 $\pm$ 0.15     | 4.21 $\pm$ 0.15   | 5.10 $\pm$ 0.27  |
| Blood feeding (a)        | Blood              | 10     | 6.18 $\pm$ 0.63     | 5.95 $\pm$ 0.63   | 6.62 $\pm$ 0.59  |
|                          |                    | 14     | 11.09 $\pm$ 0.34    | 6.74 $\pm$ 0.34   | 8.92 $\pm$ 1.26  |
|                          |                    | 18     | 23.03 $\pm$ 0.16    | 5.50 $\pm$ 0.16   | 7.18 $\pm$ 1.12  |
|                          |                    | 22     | 29.00 $\pm$ 0.23    | 4.59 $\pm$ 0.23   | 5.94 $\pm$ 0.35  |
|                          |                    | 26     | 24.06 $\pm$ 0.21    | 4.16 $\pm$ 0.21   | 5.09 $\pm$ 0.55  |
|                          |                    | 30     | 13.02 $\pm$ 0.29    | 4.47 $\pm$ 0.29   | 5.54 $\pm$ 0.49  |
|                          |                    | 32     | 15.40 $\pm$ 0.42    | 5.01 $\pm$ 0.42   | 7.01 $\pm$ 0.29  |
| Blood feeding (b)        | No blood           | 26     | na                  | 4.72 $\pm$ 0.15   | 5.95 $\pm$ 0.30  |
|                          | Blood              | 26     | 25.55 $\pm$ 0.20    | 4.08 $\pm$ 0.20   | 5.22 $\pm$ 0.29  |
| Fluctuating temperatures | DTR=0              | 20     | na                  | 5.82 $\pm$ 0.17** | 8.97 $\pm$ 0.65  |
|                          |                    | 26     | na                  | 4.39 $\pm$ 0.15   | 6.58 $\pm$ 0.41  |
|                          |                    | 32     | na                  | 5.32 $\pm$ 0.21   | 7.59 $\pm$ 0.37  |
|                          | DTR=12             | 20     | na                  | 6.38 $\pm$ 0.40   | 8.67 $\pm$ 0.37  |
|                          |                    | 26     | na                  | 5.22 $\pm$ 0.27   | 6.80 $\pm$ 0.30  |
|                          |                    | 32     | na                  | 6.16 $\pm$ 0.42   | 7.49 $\pm$ 0.50  |

\*Replicate cups were removed from the analysis due to fungal contamination (N=2 cups for 10 and 26 °C group 2; N=3 cups for 14, 18 and 28 °C; N=4 cups for other treatments)

\*\*There were N=3 cups in this treatment; N=4 for other treatments in experiment
